# Supplementary material for: Large-Scale Synthesis of Semiconducting Cu(In,Ga)Se2 Nanoparticles for Screen Printing Application
Source: MDPI journal article supplement (doi:10.3390/nano11051148), 2021-04-28
Supplement: s1 [file s1]

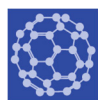

## Supporting Information

# Large-Scale Synthesis of Semiconducting Cu(In,Ga)Se<sub>2</sub> Nanoparticles for Screen Printing Application

Bruna F. Gonçalves <sup>1,2,3</sup>, Alec P. LaGrow <sup>1</sup>, Sergey Pyrlin <sup>2</sup>, Bryan Owens-Baird <sup>4,5</sup>, Gabriela Botelho <sup>3</sup>, Luis S.A. Marques <sup>2</sup>, Marta M.D. Ramos <sup>2</sup>, Kirill Kovnir <sup>4,5</sup>, Senentxu Lanceros-Mendez <sup>2,6,7</sup> and Yury V. Kolen'ko <sup>1,\*</sup>

<sup>1</sup> International Iberian Nanotechnology Laboratory, 4715-330 Braga, Portugal; bruna.goncalves@inl.int (B.F.G.); alec.lagrow@inl.int (A.P.L.)

<sup>2</sup> Center of Physics, University of Minho, 4710-057 Braga, Portugal; pyrlinsv@fisica.uminho.pt (S.P.); lsam@fisica.uminho.pt (L.S.A.M.); marta@fisica.uminho.pt (M.M.D.R.); senentxu.lanceros@bcmaterials.net (S.L.-M.)

<sup>3</sup> Center of Chemistry, University of Minho, 4710-057 Braga, Portugal; gbotelho@quimica.uminho.pt

<sup>4</sup> Department of Chemistry, Iowa State University, Ames, IA 50011, USA; bowens@iastate.edu (B.O.-B.); kovnir@iastate.edu (K.K.)

<sup>5</sup> Ames Laboratory, U.S. Department of Energy, Ames, IA 50011, USA

<sup>6</sup> BCMaterials, Basque Center for Materials, Applications and Nanostructures, UPV/EHU Science Park, 48940 Leioa, Spain

<sup>7</sup> Ikerbasque, Basque Foundation for Science, 48009 Bilbao, Spain

\* Correspondence: yury.kolenko@inl.int

## Figures

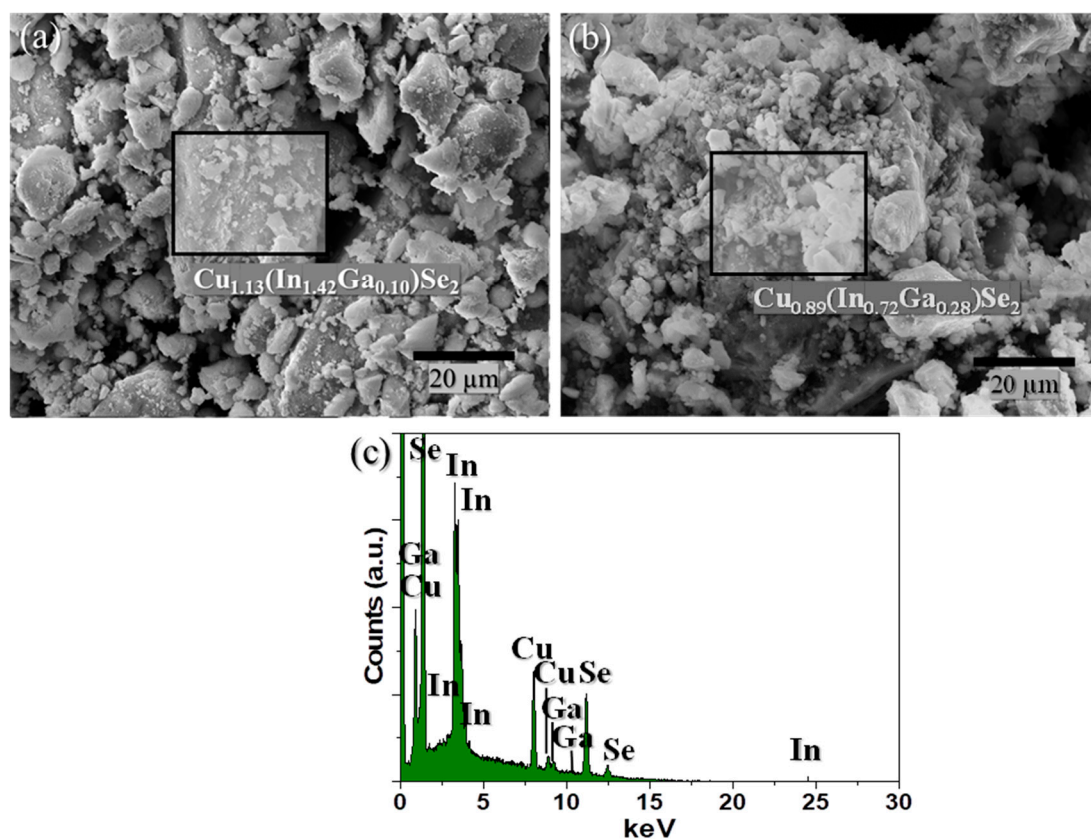

**Figure S1.** Scanning electron microscopy images of **Sample I** (a) and **Sample II** (b), and EDX spectrum of **Sample II** (c).

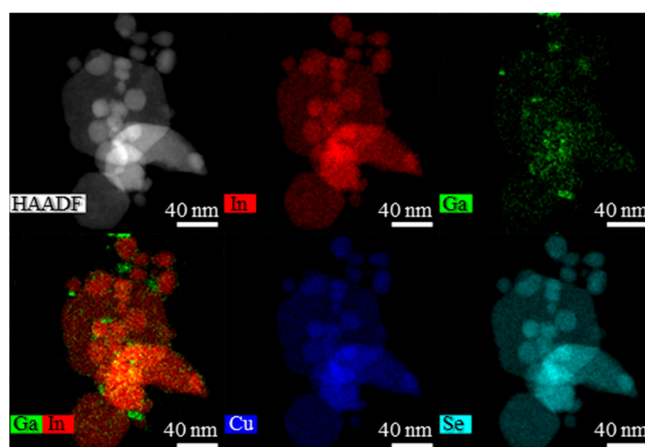

**Figure S2.** HAADF–STEM image and corresponding STEM–EDX elemental maps of **Sample I**.

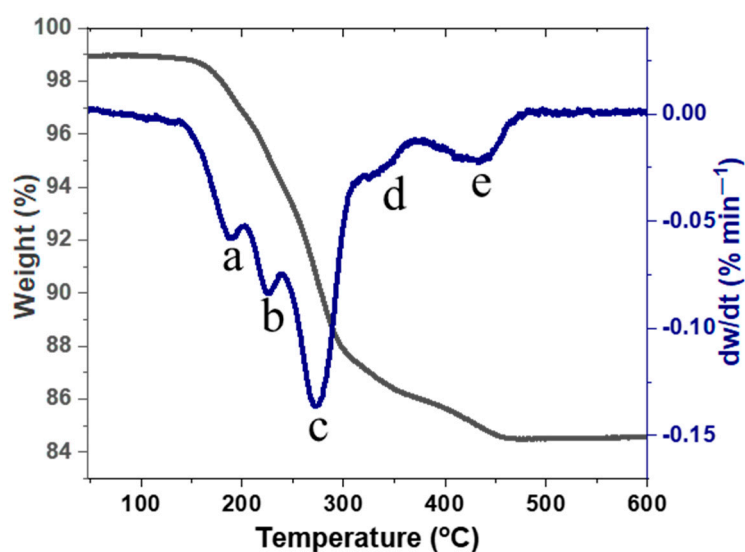

**Figure S3.** Thermogravimetric analysis with the corresponding derivative curve for the NPs from **Sample II** under Ar. Peak temperatures a: 187 °C, b: 226 °C, c: 273 °C, d: 337 °C, and e: 433 °C.

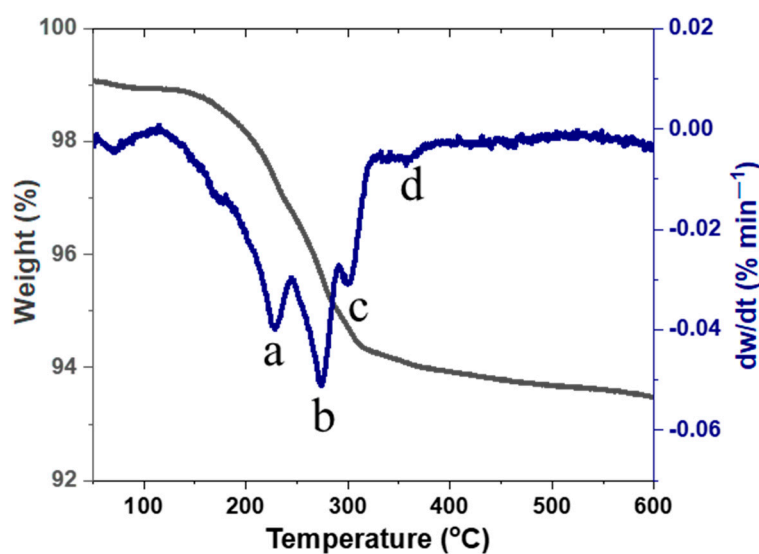

**Figure S4.** Thermogravimetric analysis with the corresponding derivative for the NPs from **Sample II** after ligand exchange under Ar. Peak temperatures a: 227 °C, b: 274 °C, c: 299 °C, and d: 357 °C.

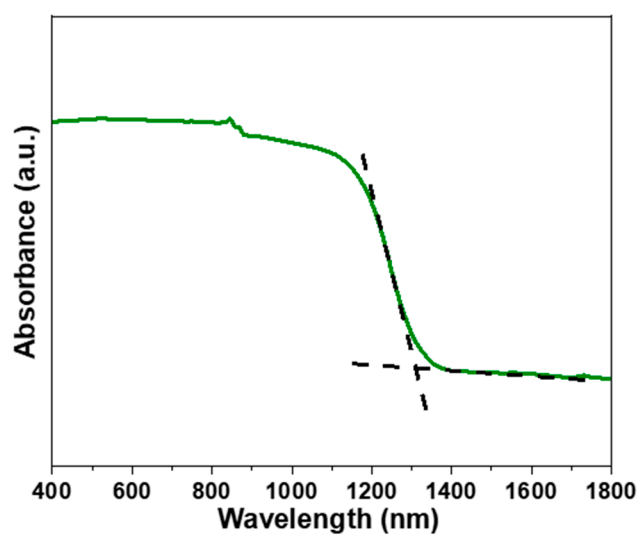

**Figure S5.** UV–Vis–NIR absorption spectrum of the synthesized NPs.

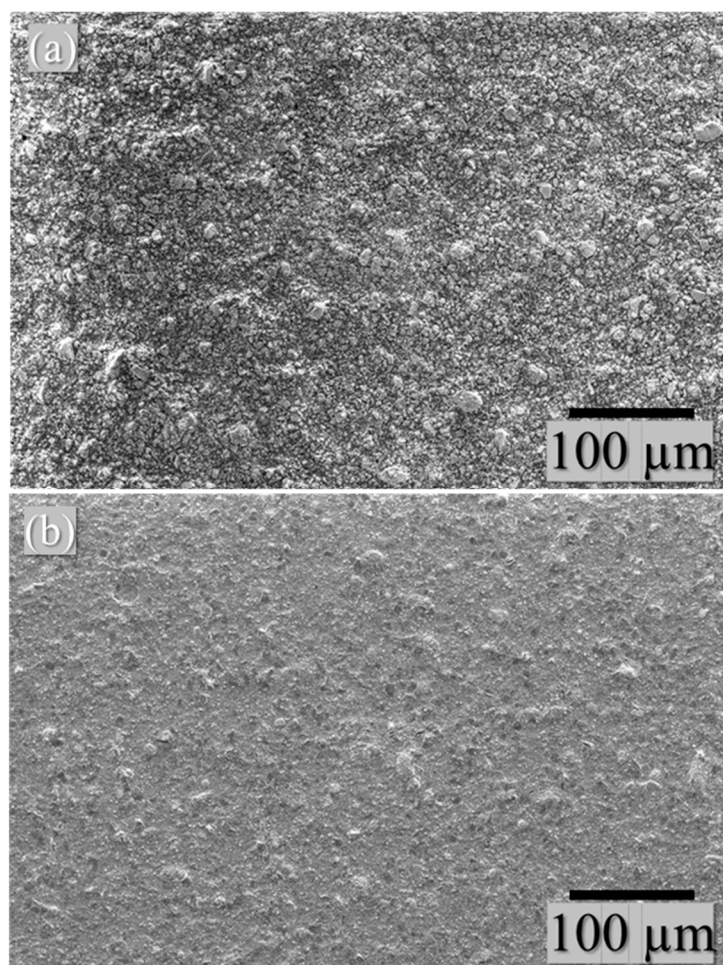

**Figure S6.** SEM surface images from screen-printed films of **Sample II** before (a) and after (b) wet ball milling.

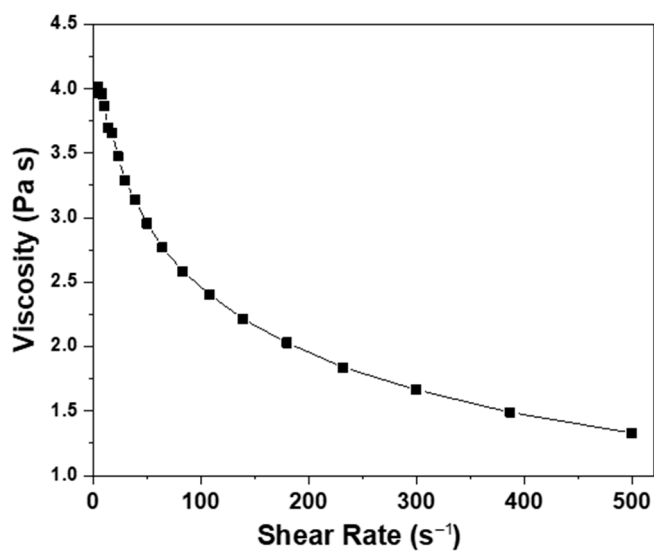

**Figure S7.** Dynamic viscosity of the formulated NP ink showing a non-Newtonian behavior.

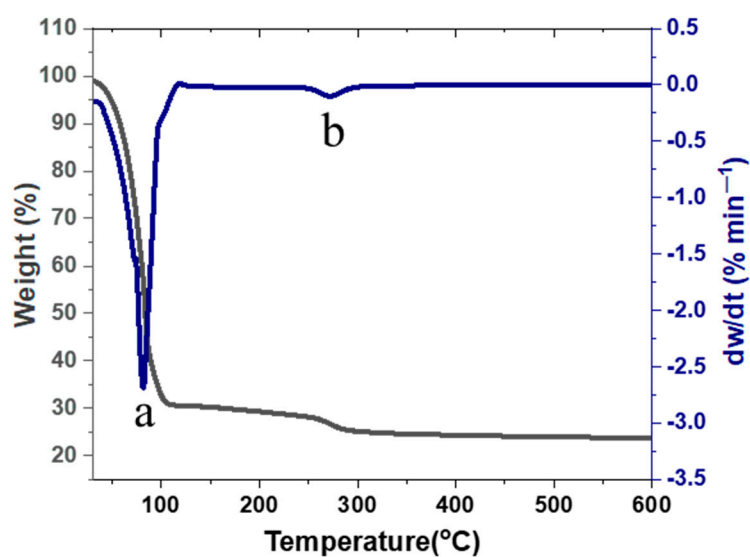

**Figure S8.** Thermogravimetric analysis with the corresponding derivative curve for the screen printable ink under Ar. Peak temperatures a: 81 °C and b: 271 °C.

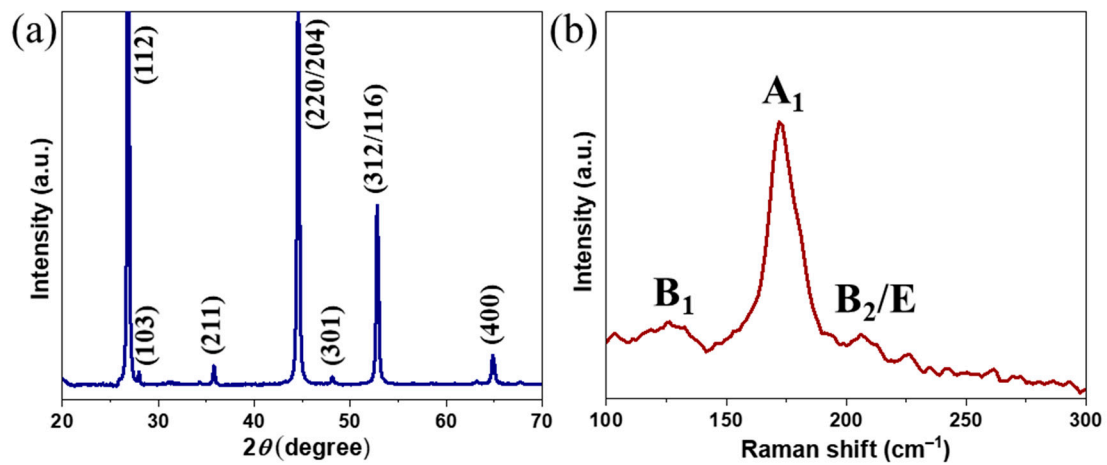

**Figure S9.** The experimental powder XRD pattern (a) and Raman spectrum (b) of the screen-printed film after annealing at 500 °C. In XRD figure, the  $hkl$  peak assignment is based on ICDD card no. 00-066-0140 for chalcopyrite.
